# Supplementary material for: Benign-Salt/DES Processing of Papyrus to Ultralight Nanocellulose Sponges for Organic-Solvent Removal
Source: Research Square preprint supplement (doi:10.21203/rs.3.rs-7780603/v1), 2025-12-12
Supplement: Supplementary file 1 [file 2e2a02acfd50d1b33c5869ba.docx]

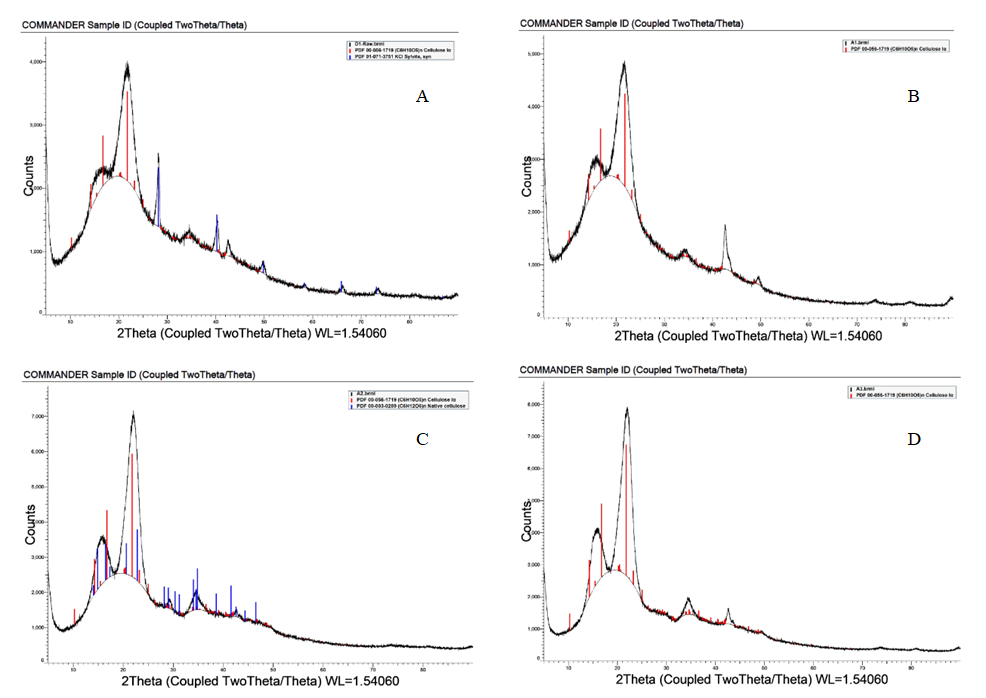


Fig. S1. X-ray diffraction crystallization analysis of raw material (A), hydrothermal treatment with solution NaCl, pretreatment (B), pulping with sodium hydroxide and hydrogen peroxide, pulping (C), extraction is also a nanocellulose material, DES extraction (D).
