# Supplementary material for: Benign-Salt/DES Processing of Papyrus to Ultralight Nanocellulose Sponges for Organic-Solvent Removal
Source: Research Square preprint supplement (doi:10.21203/rs.3.rs-7780603/v1), 2025-12-12
Supplement: Supplementary file 2 [file 7302e5d11dfd2ab3332dc254.docx]

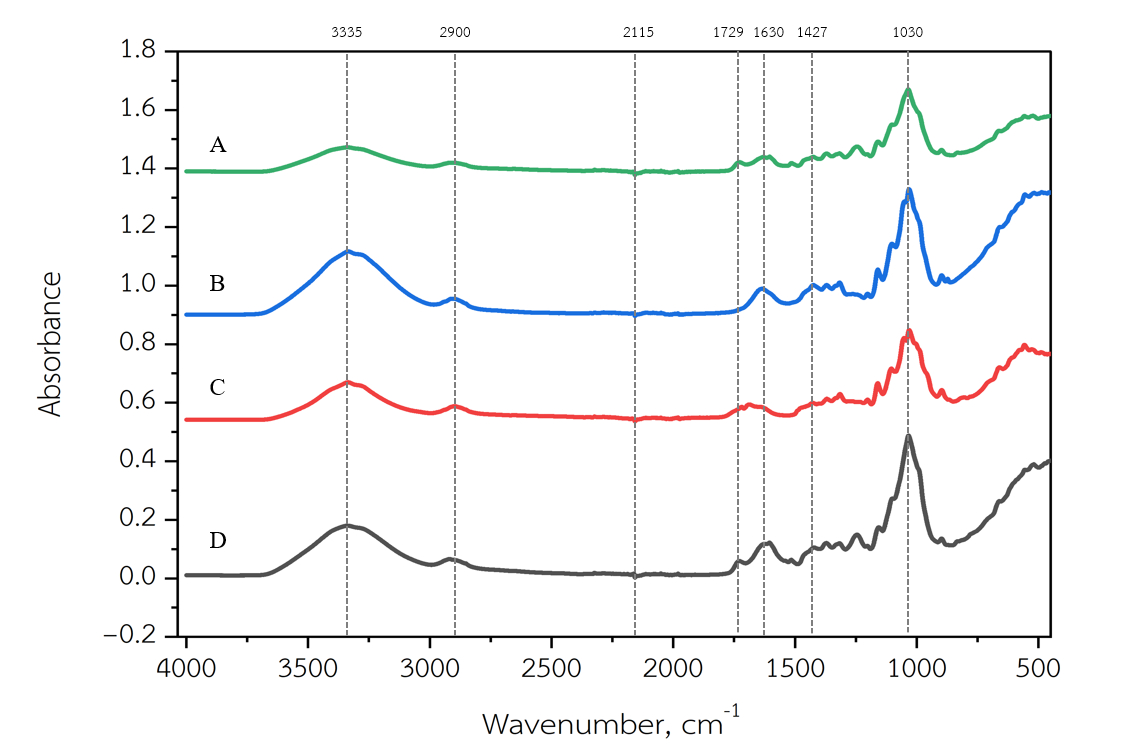


Fig. S2 ATR-FTIR spectra of sequentially treated samples: (A1) raw material; (A2) hydrothermal pretreatment; (A3) pulping with NaOH/H₂O₂; and (A4) nanocellulose obtained by DES extraction (choline chloride/oxalic acid).
